# Supplementary material for: 17-alpha hydroxyprogesterone caproate for the prevention of recurrent preterm birth among singleton pregnant women with a prior history of preterm birth: a systematic review and meta-analysis of six randomized controlled trials
Source: PubMed Central journal article supplement — Obstet Gynecol Sci. 2021 Oct 20;64(6):484–95. doi: 10.5468/ogs.21264 (PMC8595047; doi:10.5468/ogs.21264), 2021-10-20
Supplement: ogs-21264-suppl1.pdf [file ogs-21264-suppl1.pdf]

# Obstetrics & Gynecology Science

Saeed Baradwan, et al. 17OHPC for prevention of recurrent PTL

**Supplementary Table 1.** Detailed authors' judgment of the risk of bias of the included randomized controlled trials

| Bias                                                      | Authors' judgement | Support for judgement                                                                                                                                                                                                                                                                           |
|-----------------------------------------------------------|--------------------|-------------------------------------------------------------------------------------------------------------------------------------------------------------------------------------------------------------------------------------------------------------------------------------------------|
| Berghella et al. [23] (2010)                              |                    |                                                                                                                                                                                                                                                                                                 |
| Random sequence generation (selection bias)               | Low risk           | "We conducted planned secondary analysis of the Eunice Kennedy Shriver National Institute of Child Health and Human Development-sponsored randomized trial"                                                                                                                                     |
| Allocation concealment (selection bias)                   | High risk          | "Women were stratified at randomization to intent to use or not use 17P"; A matched placebo injection is not provided in the control group                                                                                                                                                      |
| Blinding of participants and personnel (performance bias) | High risk          | "Women were stratified at randomization to intent to use or not use 17P"; participants are not blinded                                                                                                                                                                                          |
| Blinding of outcome assessment (detection bias)           | Low risk           | No adequate information is provided; however measurement of outcome is unlikely to be influenced                                                                                                                                                                                                |
| Incomplete outcome data (attrition bias)                  | Low risk           | No major missing of data                                                                                                                                                                                                                                                                        |
| Selective reporting (reporting bias)                      | Low risk           | Study protocol is pre-registered and available                                                                                                                                                                                                                                                  |
| Other bias                                                | Low risk           | No other potential source of bias                                                                                                                                                                                                                                                               |
| Blackwell et al. [16] (2020)                              |                    |                                                                                                                                                                                                                                                                                                 |
| Random sequence generation (selection bias)               | Low risk           | "This was a double-blind, placebo-controlled international trial"; "randomization was performed via an interactive voice response system using a computer-generated schedule"                                                                                                                   |
| Allocation concealment (selection bias)                   | Low risk           | "The 17-OHPC was supplied as a sterile solution containing the active ingredient (hydroxyprogesterone caproate, 250 mg/mL), benzyl benzoate, castor oil, and benzyl alcohol. Placebo was identical, minus the active ingredient, and was matched in color and appearance compared with 17-OHPC" |
| Blinding of participants and personnel (performance bias) | Low risk           | "The women, their caregivers, and research personnel were not informed of the study-group assignment"                                                                                                                                                                                           |
| Blinding of outcome assessment (detection bias)           | Low risk           | "The women, their caregivers, and research personnel were not informed of the study-group assignment"                                                                                                                                                                                           |
| Incomplete outcome data (attrition bias)                  | Low risk           | No major missing of data                                                                                                                                                                                                                                                                        |
| Selective reporting (reporting bias)                      | Low risk           | Study protocol is pre-registered and available                                                                                                                                                                                                                                                  |
| Other bias                                                | Low risk           | No other potential source of bias                                                                                                                                                                                                                                                               |
| Ibrahim et al. [13] (2010)                                |                    |                                                                                                                                                                                                                                                                                                 |
| Random sequence generation (selection bias)               | Low risk           | "Randomisation was done by the use of sealed envelopes"                                                                                                                                                                                                                                         |
| Allocation concealment (selection bias)                   | Low risk           | "Randomisation was done by the use of sealed envelopes which were opened by the nurse responsible for giving the injections to all participants whether Cidolut depot or placebo"                                                                                                               |
| Blinding of participants and personnel (performance bias) | Low risk           | "Randomisation was done by the use of sealed envelopes which were opened by the nurse responsible for giving the injections to all participants whether Cidolut depot or placebo"                                                                                                               |
| Blinding of outcome assessment (detection bias)           | Low risk           | No adequate information is provided; however measurement of outcome is unlikely to be influenced                                                                                                                                                                                                |
| Incomplete outcome data (attrition bias)                  | Low risk           | No major missing of data                                                                                                                                                                                                                                                                        |
| Selective reporting (reporting bias)                      | Low risk           | Study protocol is not available but all important outcomes of interest are reported                                                                                                                                                                                                             |
| Other bias                                                | Low risk           | No other potential source of bias                                                                                                                                                                                                                                                               |

**Supplementary Table 1.** Continued

| Bias                                                      | Authors' judgement | Support for judgement                                                                                                                                              |
|-----------------------------------------------------------|--------------------|--------------------------------------------------------------------------------------------------------------------------------------------------------------------|
| Jafarpour et al. [17] (2020)                              |                    |                                                                                                                                                                    |
| Random sequence generation (selection bias)               | Low risk           | "The patients were randomly assigned into two equal groups using a permuted block randomization method"                                                            |
| Allocation concealment (selection bias)                   | Low risk           | Unpredictable sequence, no one can predict which group they will be allocated to                                                                                   |
| Blinding of participants and personnel (performance bias) | High risk          | "The control group received routine prenatal care"; no matched placebo injection is given in the control group                                                     |
| Blinding of outcome assessment (detection bias)           | Low risk           | No adequate information is provided; however measurement of outcome is unlikely to be influenced                                                                   |
| Incomplete outcome data (attrition bias)                  | Low risk           | No major missing of data                                                                                                                                           |
| Selective reporting (reporting bias)                      | Low risk           | Study protocol is pre-registered and available                                                                                                                     |
| Other bias                                                | Low risk           | No other potential source of bias                                                                                                                                  |
| Meis et al. [12] (2003)                                   |                    |                                                                                                                                                                    |
| Random sequence generation (selection bias)               | Low risk           | "We conducted a double-blind, placebo-controlled trial"; "computer-generated randomization sequence"; "randomly assigned by a central data center, in a 2:1 ratio" |
| Allocation concealment (selection bias)                   | Low risk           | "Returning eligible patients were then assigned to receive identically appearing active (17P) or placebo (castor oil) injections prepared by a research pharmacy"  |
| Blinding of participants and personnel (performance bias) | Low risk           | "The women, their caregivers, and research personnel were not informed of the study-group assignment"                                                              |
| Blinding of outcome assessment (detection bias)           | Low risk           | "The women, their caregivers, and research personnel were not informed of the study-group assignment"                                                              |
| Incomplete outcome data (attrition bias)                  | Low risk           | No major missing of data                                                                                                                                           |
| Selective reporting (reporting bias)                      | Low risk           | Study protocol is pre-registered and available                                                                                                                     |
| Other bias                                                | Low risk           | No other potential source of bias                                                                                                                                  |
| Saghafi et al. [11] (2011)                                |                    |                                                                                                                                                                    |
| Random sequence generation (selection bias)               | Low risk           | "The participants were randomly divided into two groups"                                                                                                           |
| Allocation concealment (selection bias)                   | Low risk           | Unpredictable sequence, no one can predict which group they will be allocated to                                                                                   |
| Blinding of participants and personnel (performance bias) | High risk          | "In the control group, routine perinatal care was performed"; no matched placebo injection is given in the control group                                           |
| Blinding of outcome assessment (detection bias)           | Low risk           | No adequate information is provided; however measurement of outcome is unlikely to be influenced                                                                   |
| Incomplete outcome data (attrition bias)                  | Low risk           | No major missing of data                                                                                                                                           |
| Selective reporting (reporting bias)                      | Low risk           | Study protocol is not available but all important outcomes of interest are reported                                                                                |
| Other bias                                                | Low risk           | No other potential source of bias                                                                                                                                  |

17-OHPC, 17-alpha hydroxyprogesterone caproate.
