# Supplementary material for: 17-alpha hydroxyprogesterone caproate for the prevention of recurrent preterm birth among singleton pregnant women with a prior history of preterm birth: a systematic review and meta-analysis of six randomized controlled trials
Source: PubMed Central journal article supplement — Obstet Gynecol Sci. 2021 Oct 20;64(6):484–95. doi: 10.5468/ogs.21264 (PMC8595047; doi:10.5468/ogs.21264), 2021-10-20
Supplement: ogs-21264-suppl3.pdf [file ogs-21264-suppl3.pdf]

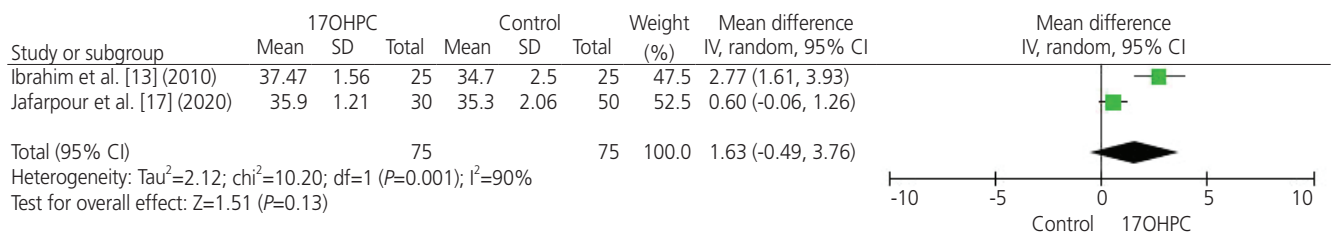

**Supplementary Fig. 2.** Meta-analysis of the mean gestational age at delivery. 17OHPC, 17-alpha hydroxyprogesterone caproate; SD, standard deviation; CI, confidence interval.
