# Supplementary material for: 17-alpha hydroxyprogesterone caproate for the prevention of recurrent preterm birth among singleton pregnant women with a prior history of preterm birth: a systematic review and meta-analysis of six randomized controlled trials
Source: PubMed Central journal article supplement — Obstet Gynecol Sci. 2021 Oct 20;64(6):484–95. doi: 10.5468/ogs.21264 (PMC8595047; doi:10.5468/ogs.21264), 2021-10-20
Supplement: ogs-21264-suppl5.pdf [file ogs-21264-suppl5.pdf]

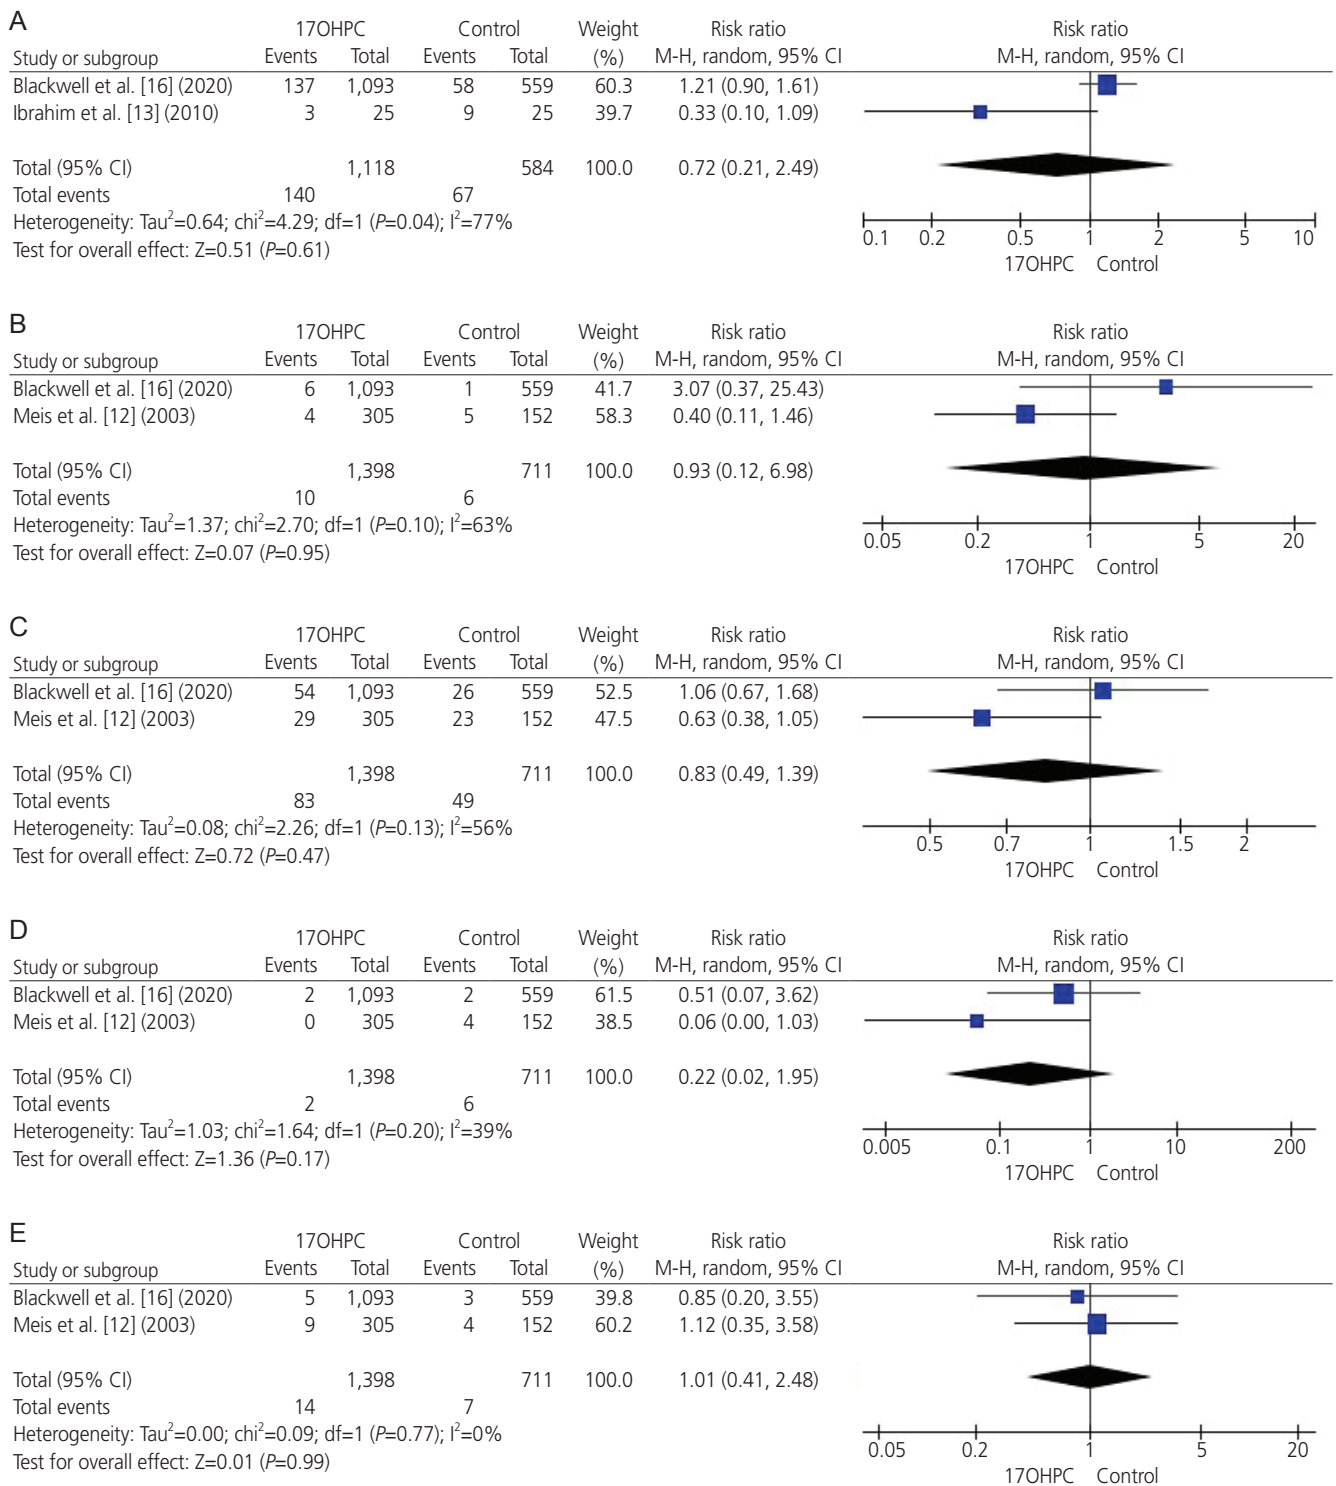

**Supplemental Fig. 4.** Meta-analysis of neonatal complications: neonatal intensive care unit admission (A), bronchopulmonary dysplasia (B), respiratory distress syndrome (C), necrotizing enterocolitis (D), sepsis (E), retinopathy (F), intraventricular hemorrhage grade III-IV (G), and patent ductus arteriosus (H). 17OHPC, 17-alpha hydroxyprogesterone caproate; M-H, Mantel-Haenszel; CI, confidence interval.

# Obstetrics & Gynecology Science

Saeed Baradwan, et al. 17OHPC for prevention of recurrent PTL

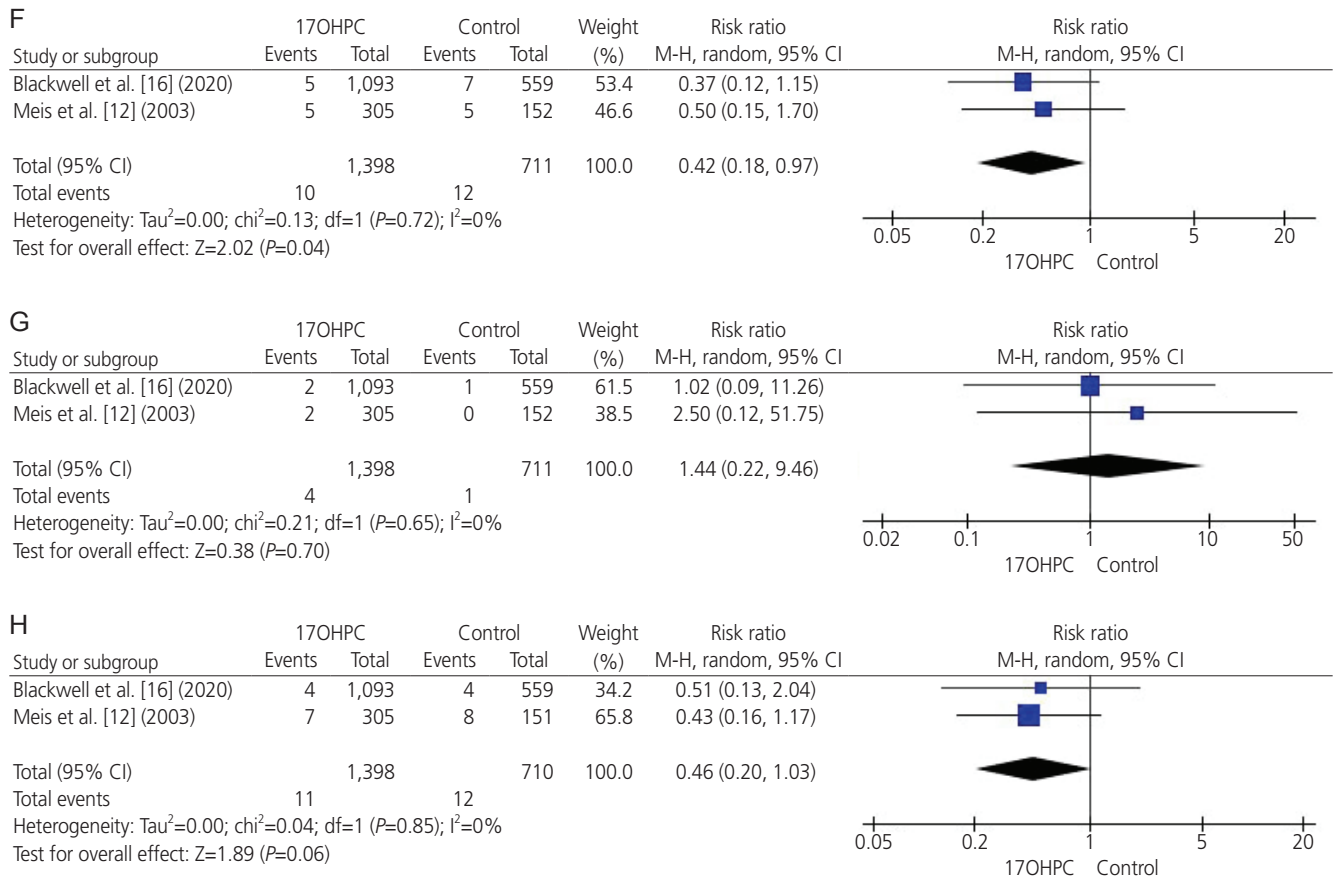

**Supplemental Fig. 4.** Continued.
