# Supplementary material for: 17-alpha hydroxyprogesterone caproate for the prevention of recurrent preterm birth among singleton pregnant women with a prior history of preterm birth: a systematic review and meta-analysis of six randomized controlled trials
Source: PubMed Central journal article supplement — Obstet Gynecol Sci. 2021 Oct 20;64(6):484–95. doi: 10.5468/ogs.21264 (PMC8595047; doi:10.5468/ogs.21264), 2021-10-20
Supplement: ogs-21264-suppl7.pdf [file ogs-21264-suppl7.pdf]

# Obstetrics & Gynecology Science

Saeed Baradwan, et al. 17OHPC for prevention of recurrent PTL

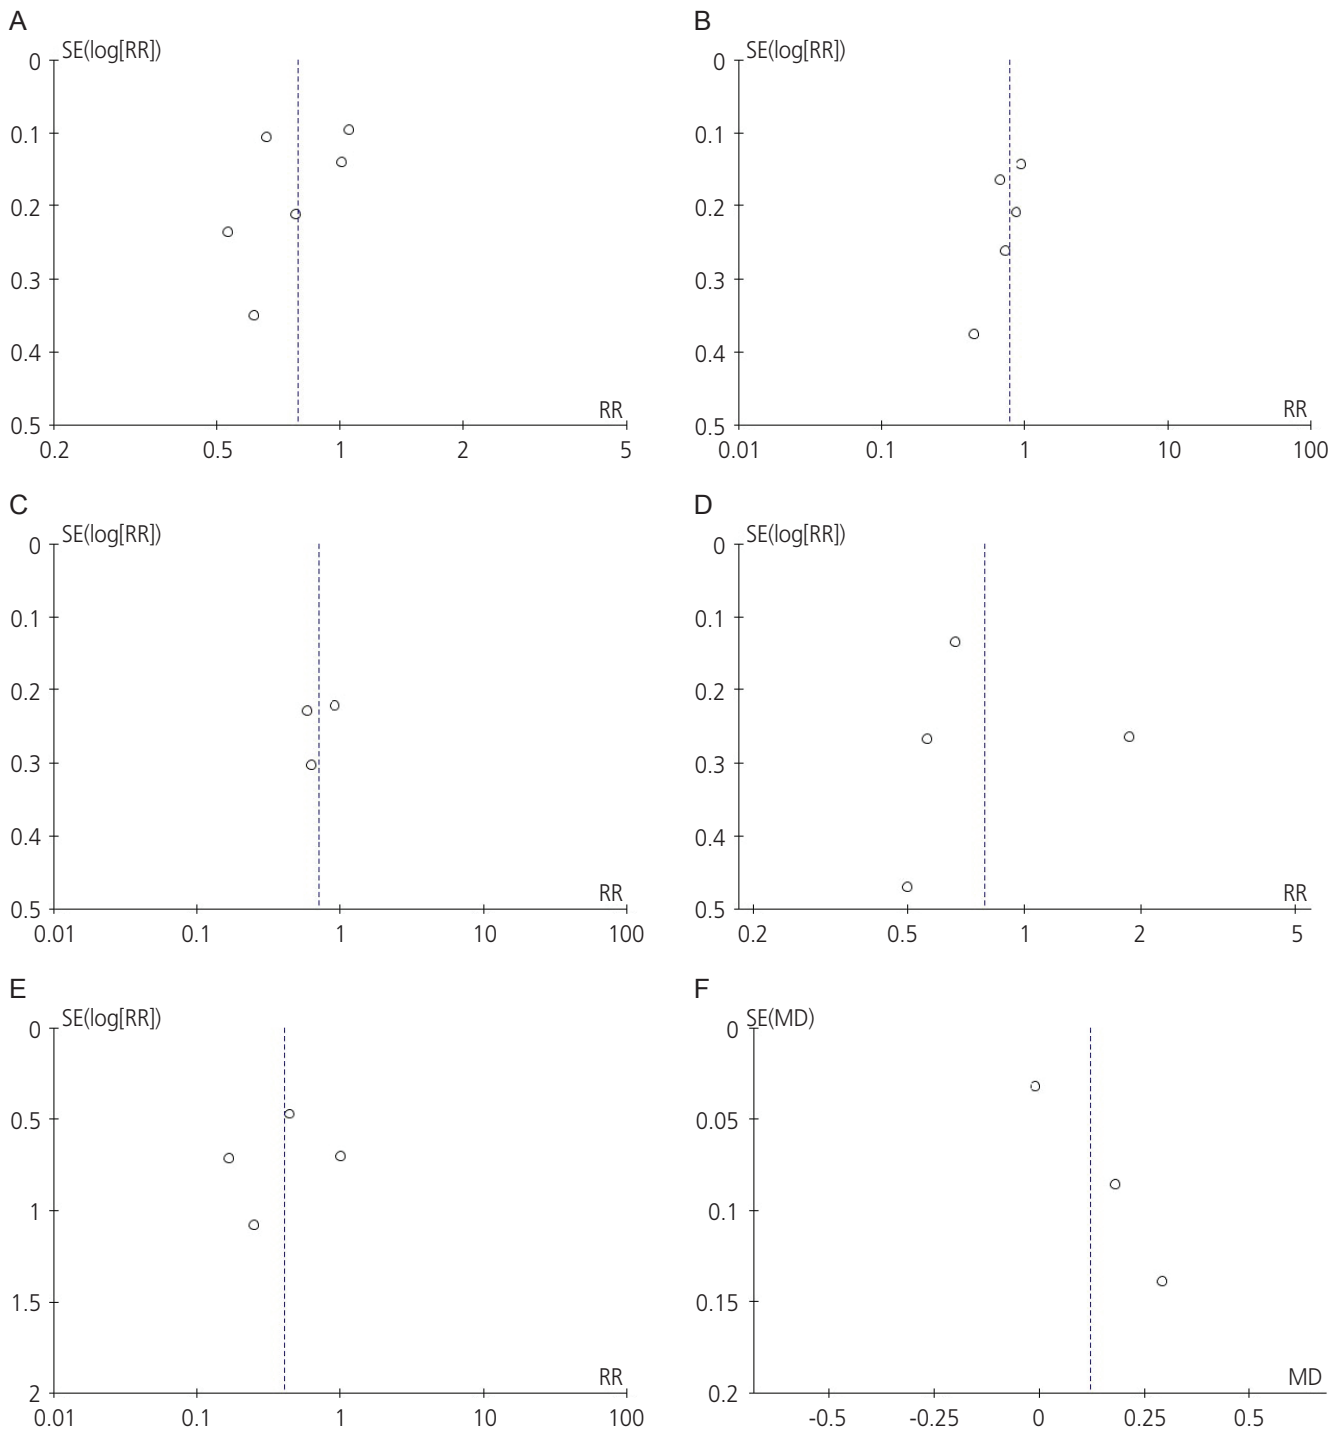

**Supplemental Fig. 6.** Funnel plots of the rate of preterm labor <37 weeks (A), rate of preterm labor <35 weeks (B), rate of preterm labor <32 weeks (C), rate of low birth weight (<2.5 kg) (D), rate of neonatal death (E), and mean birth weight at delivery (F). RR, risk ratio; SE, standard error; MD, mean difference.
